# Supplementary material for: Glycosylated zinc(ii) phthalocyanines as efficient photosensitisers for photodynamic therapy. Synthesis, photophysical properties and in vitro photodynamic activity
Source: Royal Society of Chemistry journal article supplement (doi:10.1039/b802212g), 2008-01-01
Supplement: b802212g.pdf [file b802212g.pdf]

## **Supporting Information**

### **Glycosylated Zinc(II) Phthalocyanines as Efficient Photosensitizers for Photodynamic Therapy. Synthesis, Photophysical Properties and *in vitro* Photodynamic Activity**

Chi-Fung Choi, Jian-Dong Huang, Pui-Chi Lo, Wing-Ping Fong  
and Dennis K. P. Ng\*

**Fig. S1**  $^1\text{H}$ - $^1\text{H}$  COSY spectrum of  $\text{ZnPc}(\beta\text{-PGlu})$  (**18**).

**Fig. S2** HMQC with BIRD spectrum of  $\text{ZnPc}(\beta\text{-PGlu})$  (**18**).

**Fig. S3** UV-Vis spectra of  $\text{H}_2\text{Pc}(\alpha\text{-PGlu})_4$  (**6**),  $\text{ZnPc}(\alpha\text{-PGlu})_4$  (**8**) and  
 $\text{ZnPc}(\beta\text{-PGlu})_4$  (**13**).

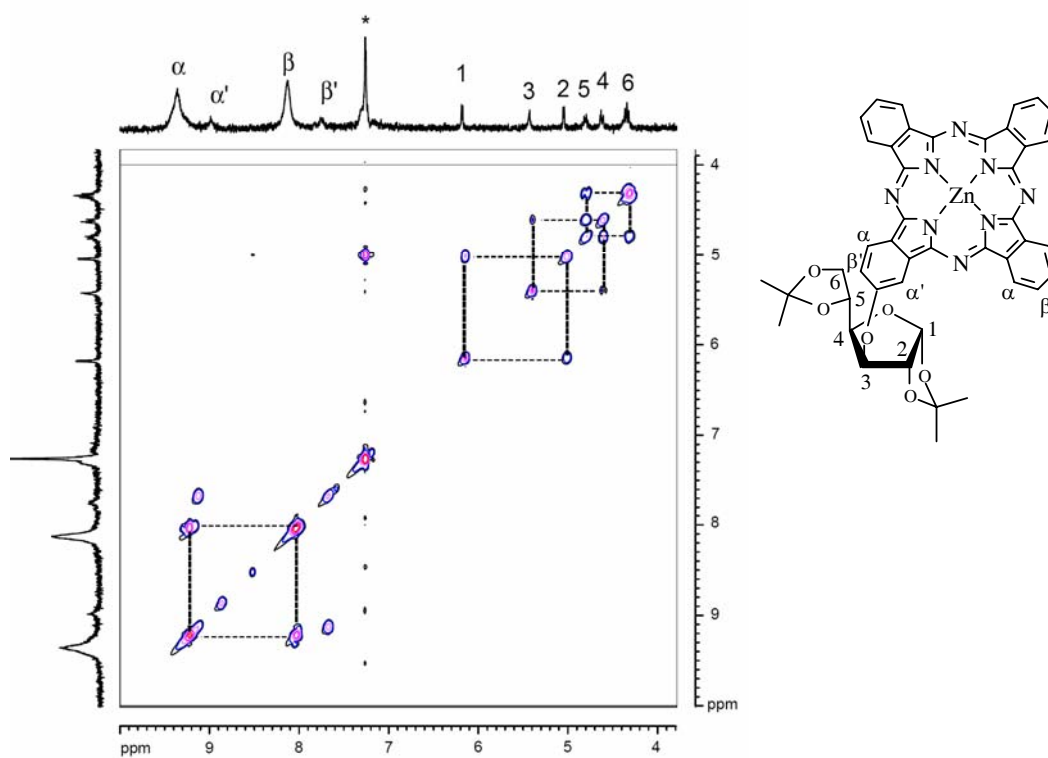

**Fig. S1**  $^1\text{H}$ - $^1\text{H}$  COSY spectrum of ZnPc( $\beta$ -PGlu) (**18**) in  $\text{CDCl}_3$  with a trace amount of pyridine- $d_5$  (ca. 1% v/v); \* indicates residual  $\text{CDCl}_3$  signal.

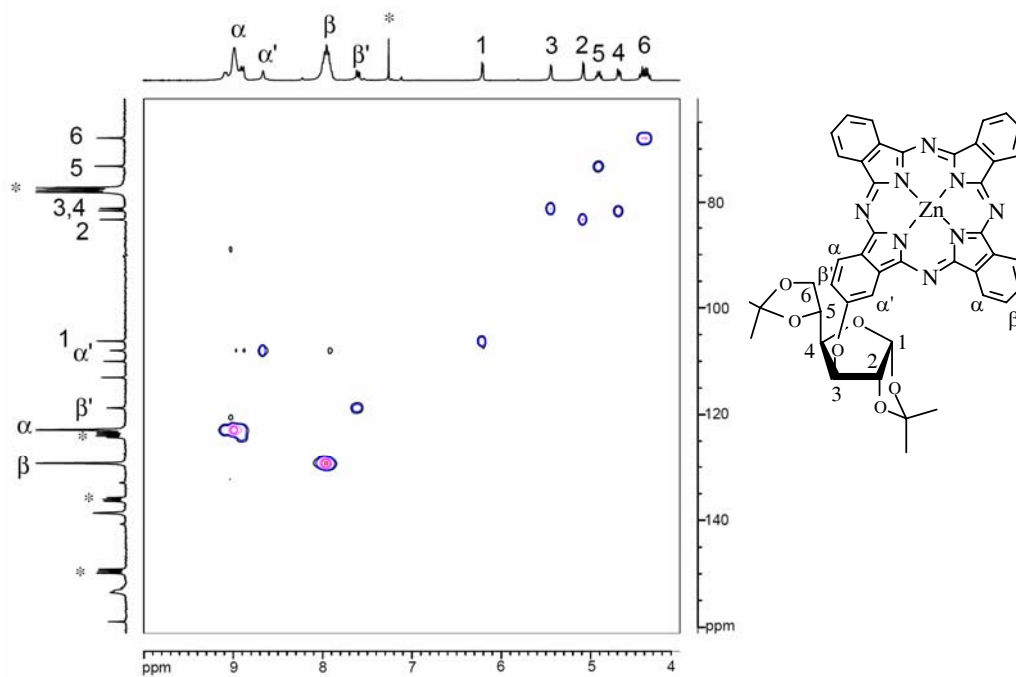

**Fig. S2** HMQC with BIRD spectrum of ZnPc(β-PGlu) (**18**) in CDCl<sub>3</sub> with a trace amount of pyridine-d<sub>5</sub> (ca. 1% v/v); \* indicates signals arising from the solvents.

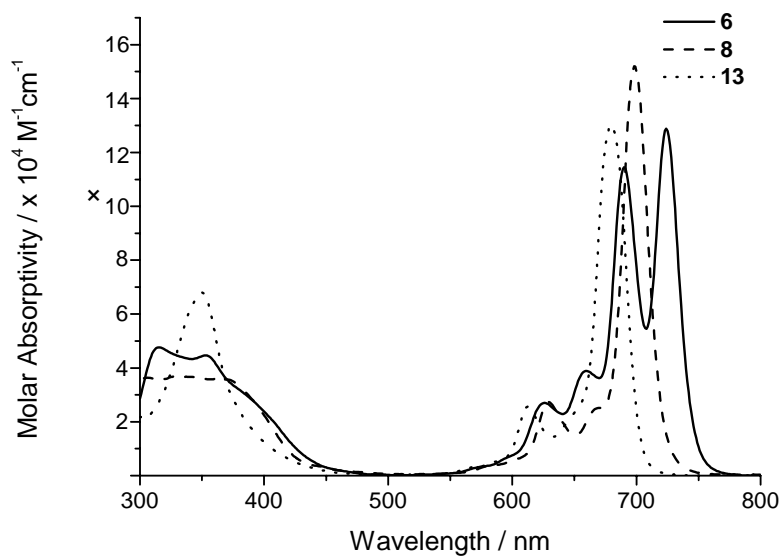

**Fig. S3** UV-Vis spectra of  $\text{H}_2\text{Pc}(\alpha\text{-PGlu})_4$  (**6**),  $\text{ZnPc}(\alpha\text{-PGlu})_4$  (**8**) and  $\text{ZnPc}(\beta\text{-PGlu})_4$  (**13**) in chloroform.
